# Supplementary material for: A series of luminescent Cu(i) mixed-ligand complexes containing 2,9-dimethyl-1,10-phenanthroline and simple diphosphine ligands
Source: Royal Society of Chemistry journal article supplement (doi:10.1039/b608641a), 2006-01-01
Supplement: b608641a.pdf [file b608641a.pdf]

## Supporting Information

**Title:** A series of luminescent Cu(I) mixed ligand complexes containing 9-dimethyl-1,10-phenanthroline and simple diphosphine ligands.

**Authors:** Ken Saito, Takashi Arai, Naoki Takahashi, Toshiaki Tsukuda, and Taro Tsubomura\*

### Spectroscopic properties of $[\text{Cu}(\text{dmp})(\text{PPh}_2-(\text{CH}_2)_5-\text{PPh}_2)]\text{PF}_6$

We believe that the complex has a dimeric structure similar to the dppb complex, but we have no data showing the nuclearity of the complex.

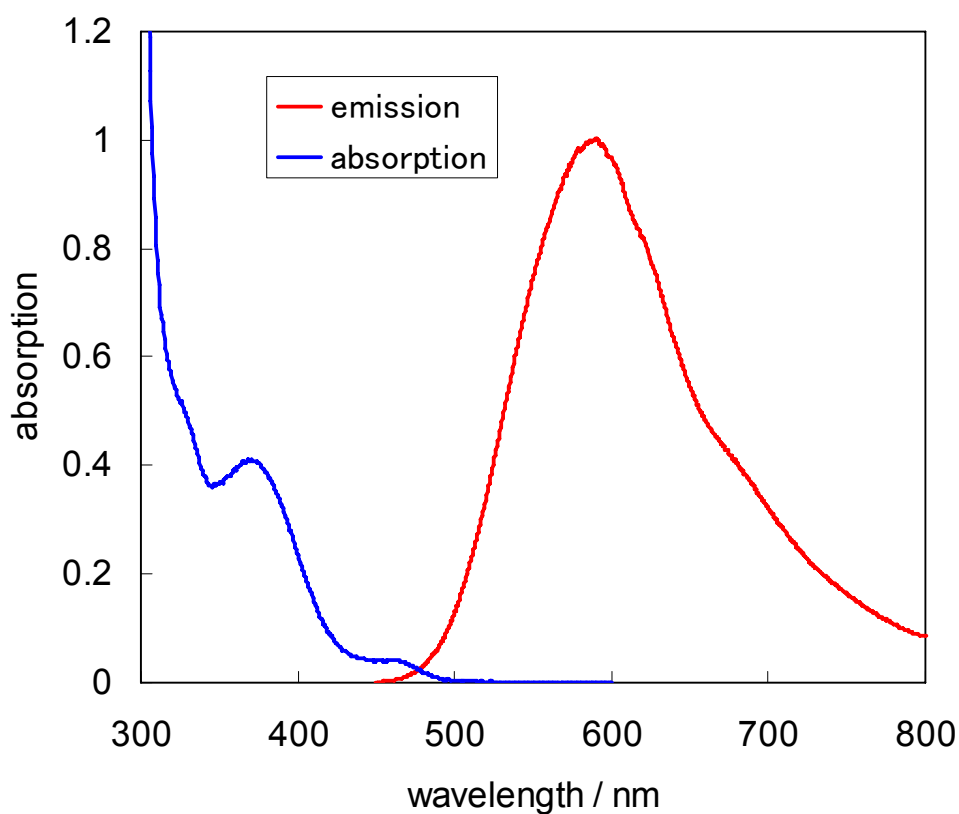

Figure S1. The absorption and corrected emission spectra of the  $[\text{Cu}(\text{dmp})(\text{PPh}_2-(\text{CH}_2)_5-\text{PPh}_2)]\text{PF}_6$  ( $2 \times 10^{-4}\text{M}$ ) in degassed  $\text{CH}_2\text{Cl}_2$  solution measured at room temperature.
